# Supplementary material for: Strategic intercalation of AB 2 O 4 perovskite oxides for synergetic enhanced redox activity in sulphonated Ti 3 C 2 T x MXene for energy storage applications
Source: Royal Society of Chemistry journal article supplement (doi:10.1039/d4ta05816j), 2024-11-20
Supplement: d4ta05816j1.pdf [file d4ta05816j1.pdf]

## Strategic intercalation of $AB_2O_4$ perovskite oxides for synergistic enhanced redox activity in sulphonated $Ti_3C_2T_x$ MXene for energy storage applications

Jitesh Pani<sup>a,b</sup>, Priyanka Chaudhary<sup>b</sup>, Hitesh Borkar<sup>\*a</sup>, Meng-Fang Lin<sup>\*b</sup>

<sup>a</sup>Department of Physics, National Institute of Technology, Warangal, Telangana 506004, India

<sup>b</sup>Department of Materials Engineering, Ming Chi University of Technology, New Taipei City 24301, Taiwan

Corresponding author email: [bhitesh@nitw.ac.in](mailto:bhitesh@nitw.ac.in), [mflin@mail.mcut.edu.tw](mailto:mflin@mail.mcut.edu.tw)

### Supporting Information

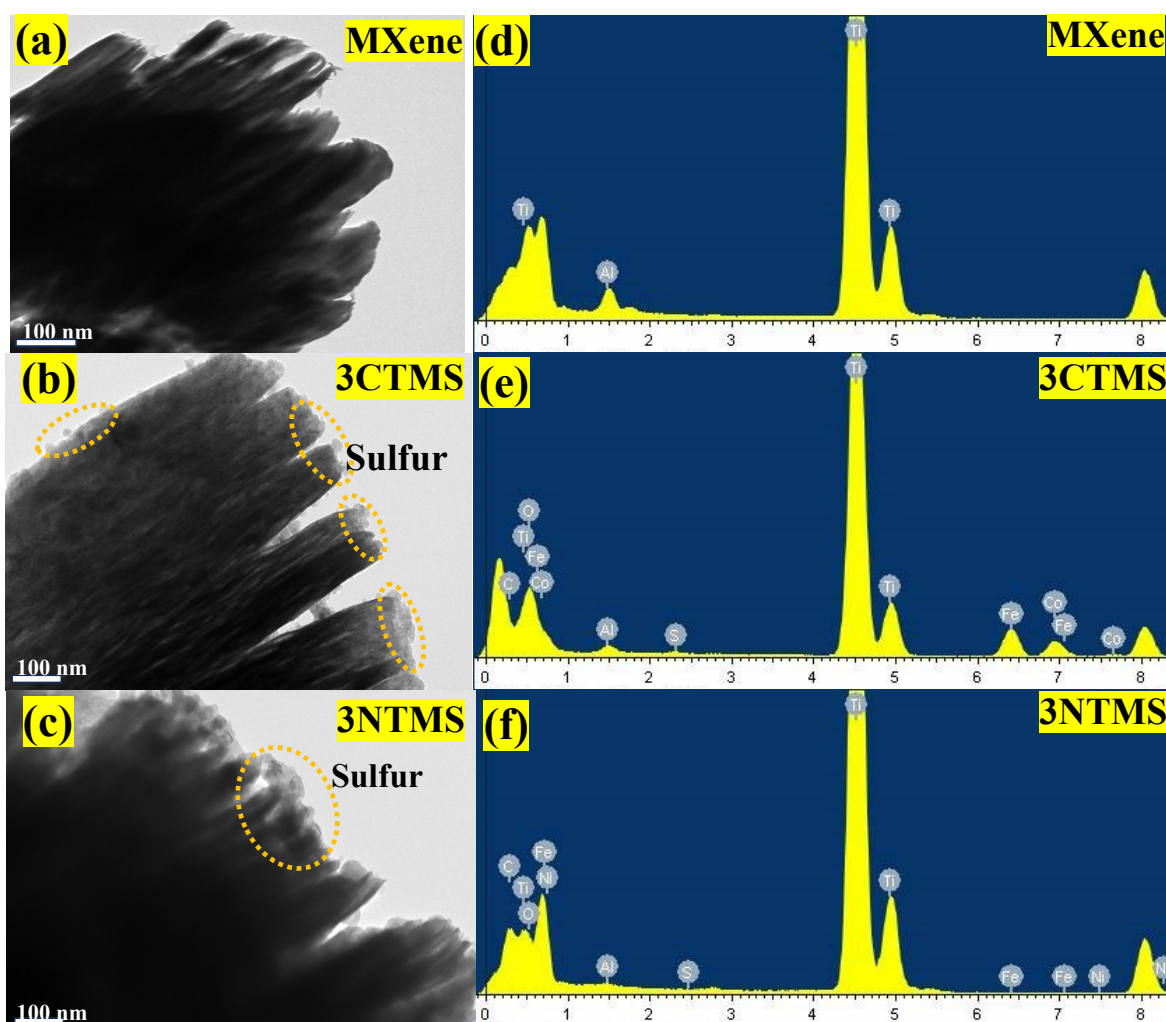

**Fig. S1** TEM image of (a) TMS, (b) 3CTMS and (c) 3NTMS showing the presence of sulphur. EDS analysis of 3CTMS, TEM image of (d) TMS, (e) 3CTMS and (f) 3NTMS.

From **Fig. S2a**, the  $\text{Ti}_3\text{AlC}_2$  MAX phase is presented, which consists of alternating Ti-C and Al layers, forming a lamellar structure. This lamellar structure suggests tight packing between layers due to the metallic bonds connecting them.<sup>1</sup> After removal of Al layer from MAX phase, **Fig. S2b** shows the successful formation of Ti-C layered structure, leading to formation of TM. The sulphonation of MXene morphology is evident in **Fig. S2c**, which shows successfully sulphonated sheets with sulfur particles on the surface of MXene, indicating the presence of  $-\text{SO}_3\text{H}$  bond attached to the surface of layered sheets. A micrograph at  $1\mu\text{m}$  magnification has been included in the inset of **Fig. S2c** to verify uniformity and delamination of sheets in TMS. The intercalation of CFO particles into the TMS layered sulphonated surface at 3, 5 and 7 wt% are presented in **Fig. S2d, e and f**, respectively. The successful insertion of NFO nanoparticles with 3, 5 and 7 wt% into the layered structure of TMS are presented in **Fig. S2g, h and i**, respectively. The elemental mapping of 3CTMS shown in **Fig. S3** confirms the sulphonation of the surface of MXene. **Fig. S3e** represents the S ion attached all throughout the surface. **Fig. S3c, g and h** confirm the presence of O, Fe and Co (Elements from  $\text{CoFe}_2\text{O}_4$ ) at the similar sites of S ion.

To have a more qualitative understanding of CFO and NFO particle insertion and elemental composition, point- Energy-dispersive X-ray (point- EDAX) analysis was carried out. Spectrum 1 in **Fig. S4a** represents the point EDAX at TMS surface whose elemental composition in terms of atomic % and mass % have been provided in table (Right hand top side) 1.37 mass % of S denotes the sulphonation of the MXene surface. Spectrum 2 in **Fig. S4b** represents the point EDAX at an inserted nanoparticle within the TMS surface whose elemental composition in terms of atomic % and mass % have been provided in table (Right hand bottom side). The dominant percentage of Co, Fe and O in spectrum 2 confirms the intercalation of CFO within the layered TMS. The spectrum labeled Spectrum 1 in **Fig. S5a** corresponds to the EDAX point at TMS surface. The elemental composition is provided in terms of both atomic percentage and mass percentage in the table located on the right-hand

top side. Point EDAX at a nanoparticle visible at the layered surface has been provided in Fig. S5b. The intercalation of NFO within the layered TMS was confirmed by prevalent proportion Ni, Fe and O as shown in table corresponding to Spectrum 2.

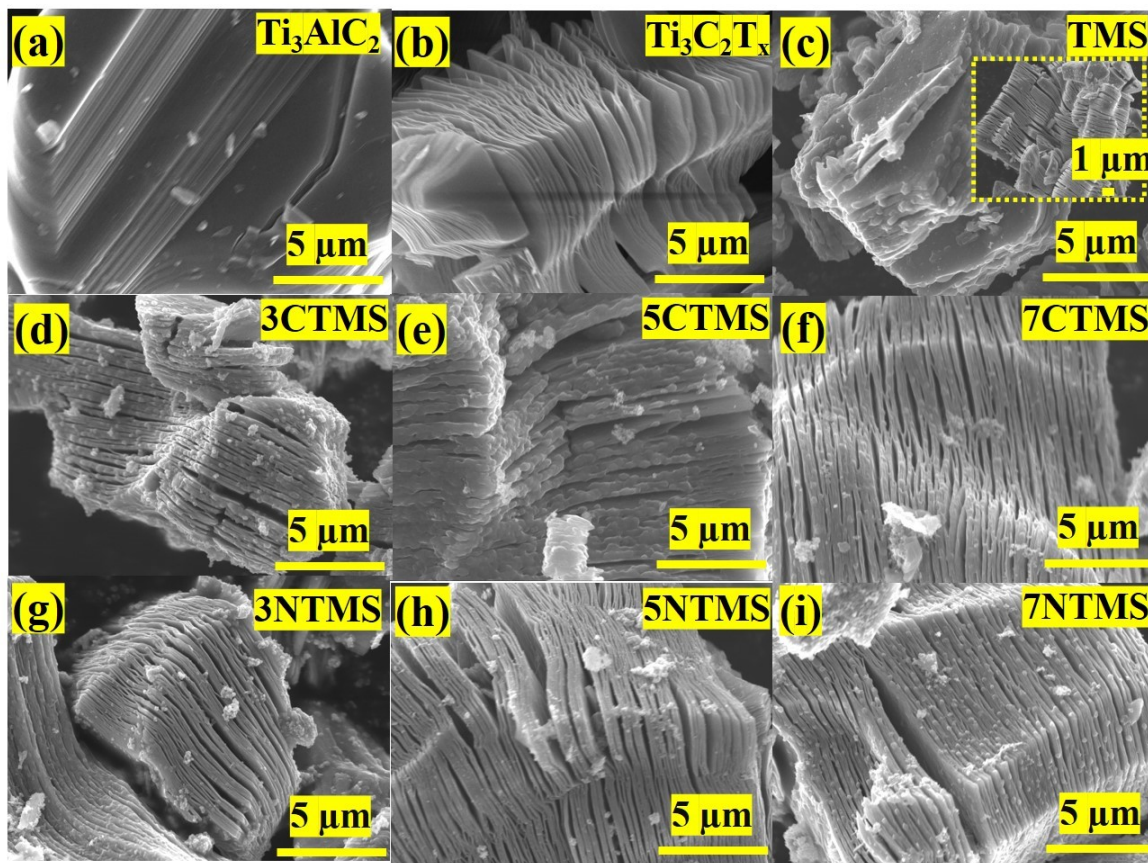

**Fig. S2** FESEM images of (a)  $\text{Ti}_3\text{AlC}_2$  MAX phase, (b)  $\text{Ti}_3\text{C}_2\text{T}_x$  MXene, (c) MXene with DMSO (Inset- Micrograph at  $1\mu\text{m}$ ), (d) 3CTMS, (e) 5CTMS, (f) 7CTMS, (g) 3NTMS, (h) 5NTMS and (i) 7 NTMS at  $5\mu\text{m}$  magnification.

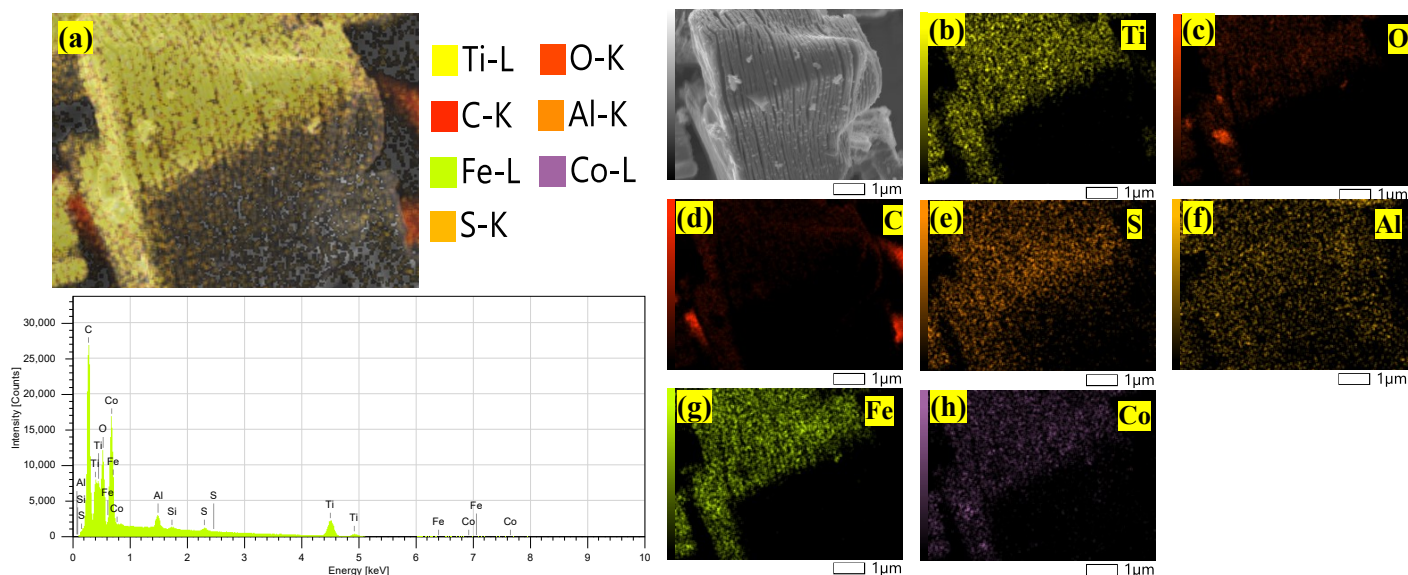

**Fig. S3** Elemental mapping of 3CTMS, showing (a) the presence of all detected elements with their intensity distribution represented in the accompanying graph, and individual mappings for (b) Ti, (c) O, (d) C, (e) S, (f) Al, (g) Fe and (h) Co.

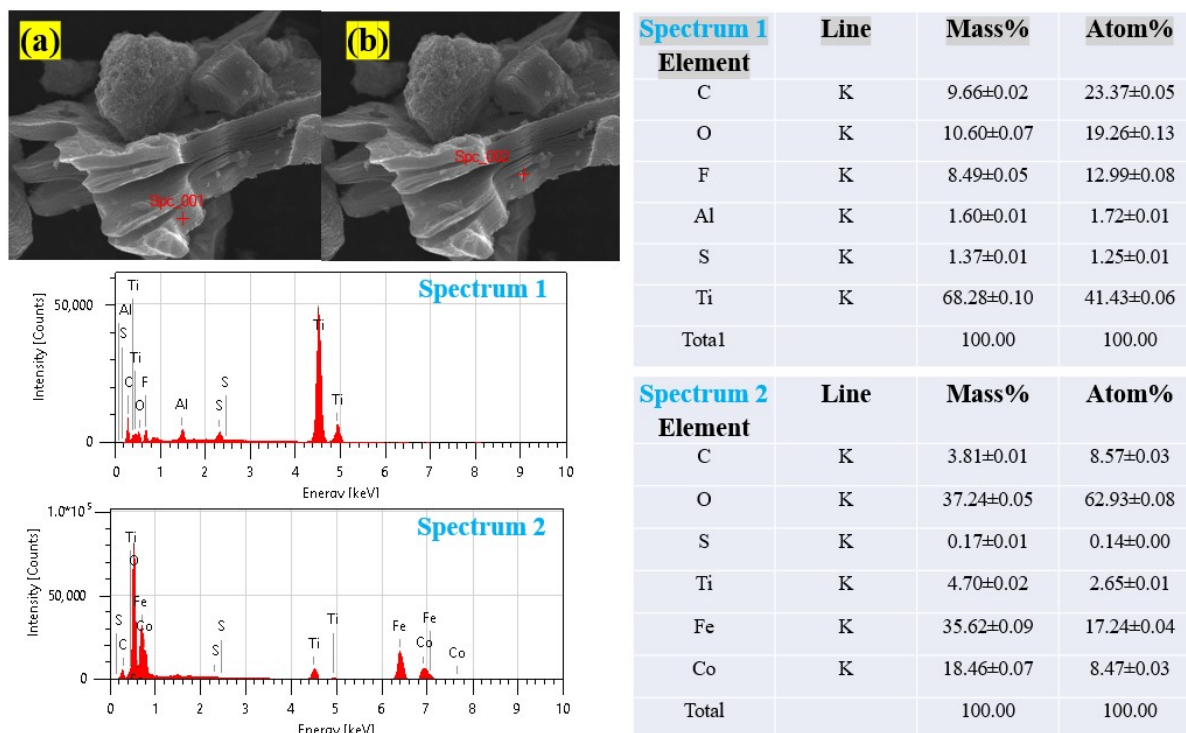

**Fig. S4** Point EDAX at two locations in 3CTMS sample: (a) Spectrum 1 showing the elemental composition of the MXene sheet (elemental percentage given in the table at the top right), (b) Spectrum 2 showing the elemental composition of  $\text{CoFe}_2\text{O}_4$  (elemental percentage given in table at the bottom right).



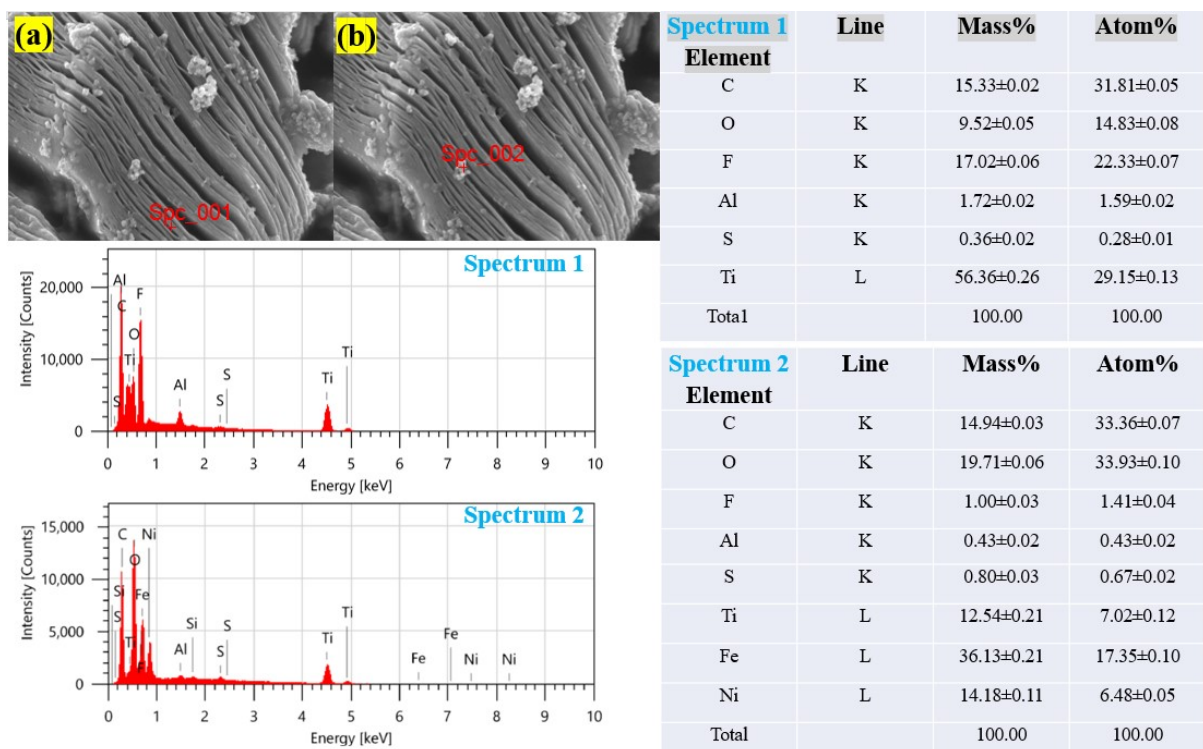

**Fig. S5** Point EDAX at two locations in the 3NTMS sample: (a) Spectrum 1 showing elemental composition of the MXene sheet (elemental percentage given in the table at the top right), (b) Spectrum 2 showing the elemental composition of  $\text{NiFe}_2\text{O}_4$  (elemental percentage given in the table at the bottom right).

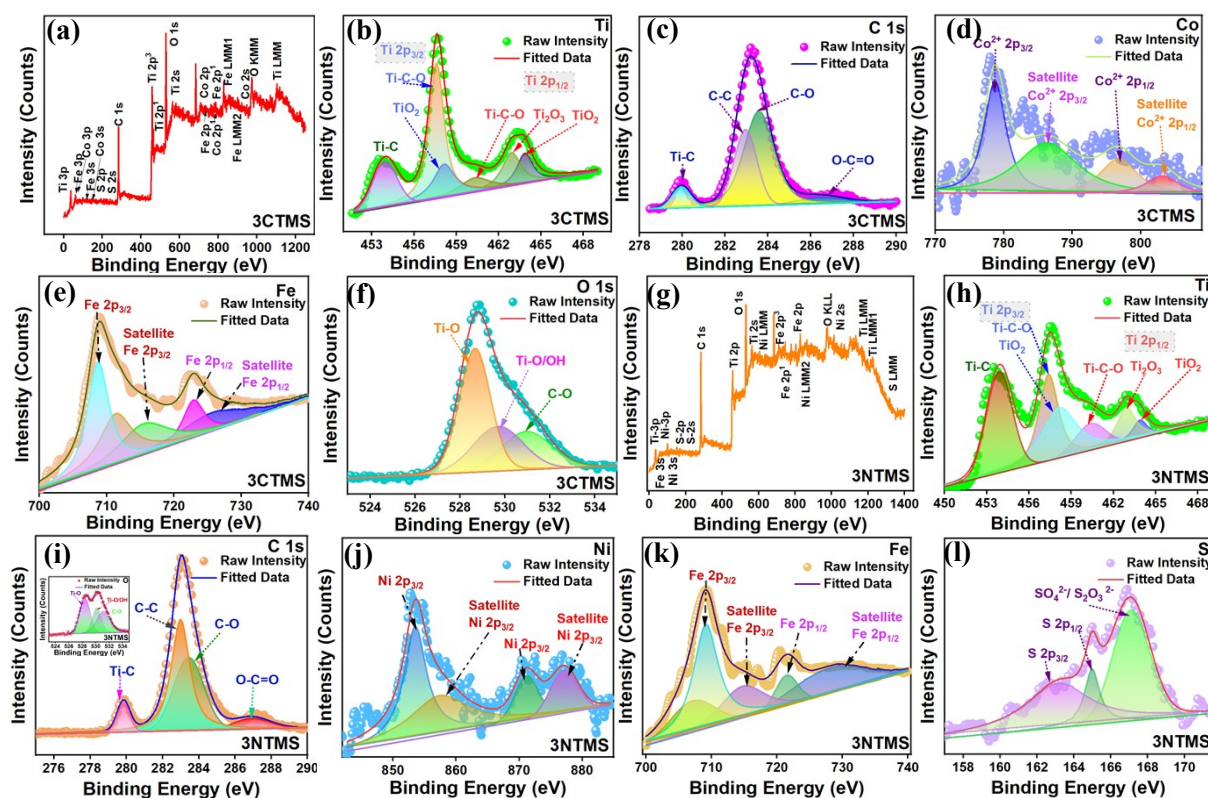

**Fig. S6** XPS survey spectra of (a) 3CTMS, with detailed XPS spectra for (b) Ti, (c) C 1s, (d) Co, (e) Fe, (g) O1s in 3CTMS. XPS survey spectra of (g) 3NTMS, with detailed XPS spectra for (h) Ti, (i) C 1s (Inset- O Spectra), (j) Ni, (k) Fe, (l) S in 3NTMS.

**Fig. S6a** shows the survey XPS spectra of 3CTMS, confirming the presence of Ti 2p, O1s, Fe 2p, Co 2p, C 1s and S 2s. A comparison of XPS peak assignments and corresponding areas for 3CTMS and 3NTMS is provided in **Table S1**. **Fig. S6b** demonstrates the high-resolution XPS spectrum of Ti with fitting results peaks at 457.59 and 460.3 eV corresponding to Ti-C-O (Ti 2p<sub>3/2</sub>) and Ti-C-O (Ti 2p<sub>1/2</sub>), respectively. Peaks at binding energies 453.9 and 462.9 eV correspond to Ti-C and Ti<sub>2</sub>O<sub>3</sub> bonds<sup>2</sup>. Additionally, peaks at 458.13 and 463.8 eV are assigned to TiO<sub>2</sub> (Ti 2p<sub>3/2</sub>) and TiO<sub>2</sub> (Ti 2p<sub>1/2</sub>), respectively, which align with previously reported results.<sup>3</sup> Based on binding energy, the deconvoluted C 1s spectrum shows fitted peaks for Ti-C, C-C, C-O and O-C=O at 279.57, 282.95, 283.58 and 286.46 eV, respectively. The presence of Ti-C and O-C=O confirms the incorporation of CFO within TMS. **Fig. S6d, e and f** show the high resolution XPS spectra for Co, Fe and O, respectively, in the CFO phase. The Co spectrum shows peaks corresponding to Co<sup>2+</sup>2p<sub>3/2</sub>, Satellite Co<sup>2+</sup>2p<sub>3/2</sub>, Co<sup>2+</sup>2p<sub>1/2</sub> and Satellite Co<sup>2+</sup>2p<sub>1/2</sub> at 778.71, 796.8, 786.3 and 803.2 eV, respectively.<sup>4,5</sup> The Co<sup>2+</sup> oxidation state, as obtained from XPS, indicates successful CFO formation, stable under MXene and DMSO sonication process. **Fig. S6e** shows the XPS spectra for Fe 2p. Oxidation states of Fe 2p are indicated to be Fe 2p<sub>3/2</sub> and Fe 2p<sub>1/2</sub> at 708.712 and 722.89 eV, respectively. Peaks at 711.35 and 725.77 eV ascribed to oscillating satellite peaks for Fe 2p<sub>3/2</sub> and Fe 2p<sub>1/2</sub>, respectively. Ti-O, Ti-O/OH and C-O constitutional chemical species of O are observed at 528.66, 529.69 and 530.95 eV as shown in **Fig. S6f**. The existence of Ti 2p, O1s, Fe 2p, Ni 2p, C 1s and S 2s have been evidenced in survey spectrum of 3NTMS as presented in **Fig. S6b**. **Fig. S6h** demonstrates the high-resolution spectra of Ti and its fitting where the peaks at 457.388 and 460.370 eV corresponds to Ti-C-O (Ti 2p<sub>3/2</sub>)

and Ti-C-O (Ti 2p<sub>1/2</sub>), respectively. Peaks at binding energy 453.89 and 462.91 eV indicates the presence of Ti-C and Ti<sub>2</sub>O<sub>3</sub> bonds <sup>2</sup>. Peaks at 458.170 and 463.88 eV are assigned to TiO<sub>2</sub> (Ti 2p<sub>3/2</sub>) and TiO<sub>2</sub> (Ti 2p<sub>1/2</sub>), respectively which are consistent with previously reported results.<sup>3</sup> The sulphonation of MXene surface is confirmed by the sharp S peaks in **Fig. S6l**. Based on binding energy, the deconvoluted fitted peaks of C 1s shows Ti-C, C-C, C-O and O-C=O at 279.84, 282.99, 283.44, 286.94 and 289.71 eV, respectively (**Fig. S6i**). Ti-O, Ti-O/OH and C-O constitutional chemical species of O are observed at 528.40, 530.14 and 531.11 eV as shown in inset of **Fig. S6i**. The Ni<sup>2+</sup> oxidation state as obtained in XPS is responsible for successful NFO formation and stable under MXene and DMSO sonication process.<sup>6</sup> **Fig. S6j** presents the high resolution XPS spectra of Ni indicating the existence of Ni 2p<sub>3/2</sub> and Ni 2p<sub>1/2</sub> at 853.33 and 873.5 eV, respectively.<sup>7</sup> The satellite peaks coordinating with Ni 2p<sub>3/2</sub> and Ni 2p<sub>1/2</sub> exists at 855.7 and 878.44 eV, respectively. <sup>8</sup> **Fig. S6k** shows the XPS spectra for Fe 2p, with oxidation states of Fe 2p indicated by Fe 2p<sub>3/2</sub> and Fe 2p<sub>1/2</sub> at 707.08 and 721.45 eV. Peaks at 709.16 and 714.9 eV ascribed to oscillating satellite peaks for Fe 2p<sub>3/2</sub> and Fe 2p<sub>1/2</sub>, respectively. Peaks at 163.162 and 164.985 eV corresponds to S 2p<sub>3/2</sub> and S 2p<sub>1/2</sub>, respectively. <sup>9</sup> The sulphonation of the MXene surface is confirmed through presence of SO<sub>4</sub><sup>2-</sup>/S<sub>2</sub>O<sub>3</sub><sup>2-</sup> peak as shown in **Fig. S6l**. The peak position of this state in the composition is at 167.36 eV well in agreement with previously reported data confirming SO<sub>4</sub><sup>2-</sup>/S<sub>2</sub>O<sub>3</sub><sup>2-</sup> states. <sup>10</sup>

**Table S1. Binding energies and peak areas of 3CTMS and 3NTMS in XPS spectra**

| S. No. | Element | Bonding                                                                       | Peak Position, BE (eV) |               | % Area        |               |
|--------|---------|-------------------------------------------------------------------------------|------------------------|---------------|---------------|---------------|
|        |         |                                                                               | 3CTMS                  | 3NTMS         | 3CTMS         | 3NTMS         |
| 1      | Ti      | Ti-C                                                                          | 453.93                 | 453.89        | 8094.92       | 10955.72      |
| 2      |         | Ti-C-O<br>(Ti 2p <sub>3/2</sub> )                                             | 457.59                 | 457.38        | 20194.03      | 9062.4        |
| 3      |         | TiO <sub>2</sub> (Ti<br>2p <sub>3/2</sub> )                                   | 458.13                 | 458.17        | 7739.52       | 10007.43      |
| 4      |         | Ti-C-O<br>(Ti 2p <sub>1/2</sub> )                                             | 460.3                  | 460.37        | 4428.18       | 3356.77       |
| 5      |         | Ti <sub>2</sub> O <sub>3</sub>                                                | 462.9                  | 462.91        | 6337.12       | 3637.12       |
| 6      |         | TiO <sub>2</sub> (Ti<br>2p <sub>1/2</sub> )                                   | 463.8                  | 463.88        | 4795.11       | 1480.29       |
| 7      | S       | S 2p <sub>3/2</sub>                                                           | <b>162.51</b>          | <b>163.16</b> | <b>77.99</b>  | <b>405.18</b> |
| 8      |         | S 2p <sub>1/2</sub>                                                           | <b>165.54</b>          | <b>164.98</b> | <b>168.36</b> | <b>118.97</b> |
| 9      |         | SO <sub>4</sub> <sup>2-</sup><br>/S <sub>2</sub> O <sub>3</sub> <sup>2-</sup> | <b>167.3</b>           | <b>167.1</b>  | <b>388.64</b> | <b>391.96</b> |
| 10     | C       | Ti-C                                                                          | 279.95                 | 279.84        | 1142.14       | 1408.48       |
| 11     |         | C-C                                                                           | 282.95                 | 282.9         | 5219.38       | 10852.22      |
| 12     |         | C-O                                                                           | 283.58                 | 283.44        | 10198.47      | 8461.61       |
| 13     |         | O-C=O                                                                         | 286.46                 | 286.9         | 908.1         | 1465.39       |
| 14     | Co      | Co <sup>2+</sup> 2p <sub>3/2</sub>                                            | 778.71                 | -             | 2823.52       | -             |
| 15     |         | Co <sup>2+</sup> 2p <sub>1/2</sub>                                            | 796.8                  | -             | 1503.81       | -             |
| 16     |         | Satellite<br>Co <sup>2+</sup> 2p <sub>3/2</sub>                               | 786.3                  | -             | 3511.03       | -             |
| 17     |         | Satellite<br>Co <sup>2+</sup> 2p <sub>1/2</sub>                               | 803.2                  | -             | 698.73        | -             |
| 18     | Fe      | Fe 2p <sub>3/2</sub>                                                          | 708.71                 | 707.08        | 4277.34       | 1269.78       |
| 19     |         | Satellite<br>Fe 2p <sub>3/2</sub>                                             | 711.35                 | 709.12        | 3261.45       | 3407.71       |
| 20     |         | Satellite<br>Fe 2p <sub>1/2</sub>                                             | 715.48                 | 714.9         | 2686.8        | 1507.04       |
| 21     |         | Fe 2p <sub>1/2</sub>                                                          | 722.89                 | 721.45        | 1436.64       | 628.82        |



|    |    |                                   |        |         |         |          |
|----|----|-----------------------------------|--------|---------|---------|----------|
| 22 |    | Satellite<br>Fe 2p <sub>1/2</sub> | 725.77 | 725.83  | 2172.85 | 1650.52  |
| 23 | O  | Ti-O                              | 528.66 | 528.4   | 17666   | 12507.74 |
| 24 |    | Ti-O/OH                           | 529.69 | 530.14  | 9780.99 | 9112.06  |
| 25 |    | C-O                               | 530.95 | 531.11  | 8450.63 | 11016.67 |
| 26 | Ni | Ni 2p <sub>3/2</sub>              | -      | 853.33  | -       | 1133.53  |
| 27 |    | Satellite<br>Ni 2p <sub>3/2</sub> | -      | 855.7   | -       | 4106.93  |
| 28 |    | Ni 2p <sub>1/2</sub>              | -      | 873.500 | -       | 2901.037 |
| 29 |    | Satellite<br>Ni 2p <sub>1/2</sub> | -      | 878.448 | -       | 397.912  |

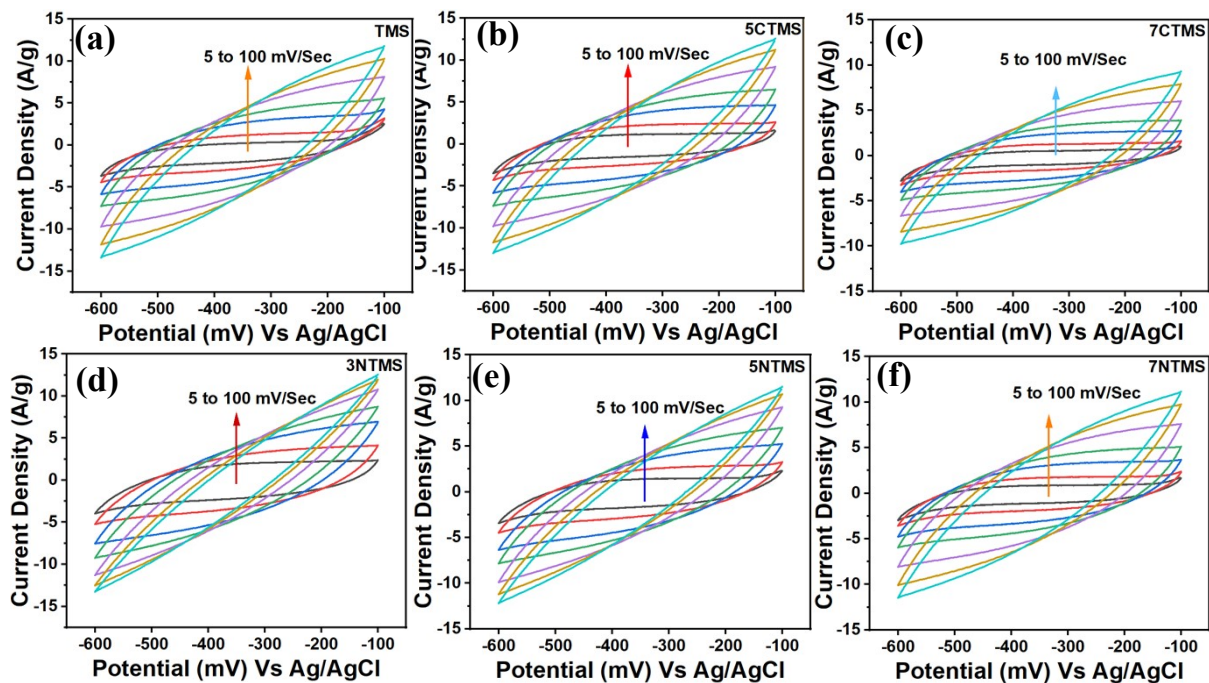

**Fig. S7** CV curves at scan rates from 5 to 100 mV/sec of (a) bare sulphated  $\text{Ti}_3\text{C}_2\text{T}_x$ , (b) 5 wt%  $\text{CoFe}_2\text{O}_4$  intercalated sulphated  $\text{Ti}_3\text{C}_2\text{T}_x$ , (c) 7 wt%  $\text{CoFe}_2\text{O}_4$  intercalated sulphated  $\text{Ti}_3\text{C}_2\text{T}_x$ , (d) 3NTMS, (e) 5 wt%  $\text{NiFe}_2\text{O}_4$  intercalated sulphated  $\text{Ti}_3\text{C}_2\text{T}_x$  and 7 wt%  $\text{NiFe}_2\text{O}_4$  intercalated sulphated  $\text{Ti}_3\text{C}_2\text{T}_x$ .

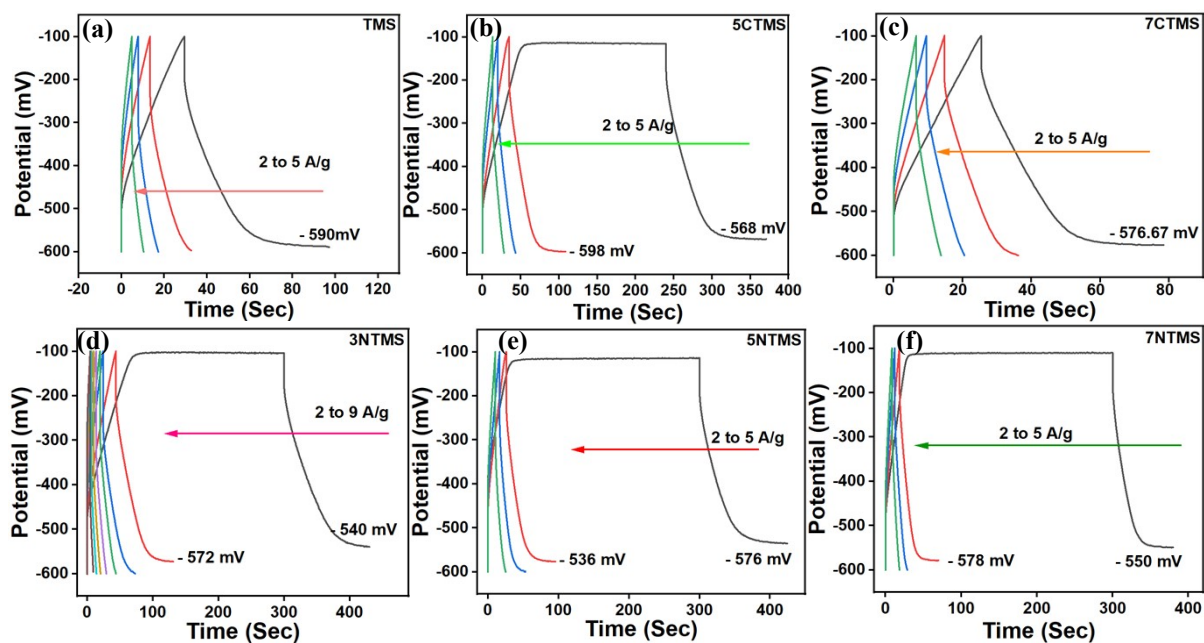

**Fig. S8** GCD curves at various current densities of (a) Sulphonated  $Ti_3C_2T_x$ , (b) 5 wt%  $CoFe_2O_4$  intercalated sulphonated  $Ti_3C_2T_x$ , (c) 7 wt%  $CoFe_2O_4$  intercalated sulphonated  $Ti_3C_2T_x$ , (d) 3NTMS, (e) 5 wt%  $NiFe_2O_4$  intercalated sulphonated  $Ti_3C_2T_x$  and (f) 7 wt%  $NiFe_2O_4$  intercalated sulphonated  $Ti_3C_2T_x$ .

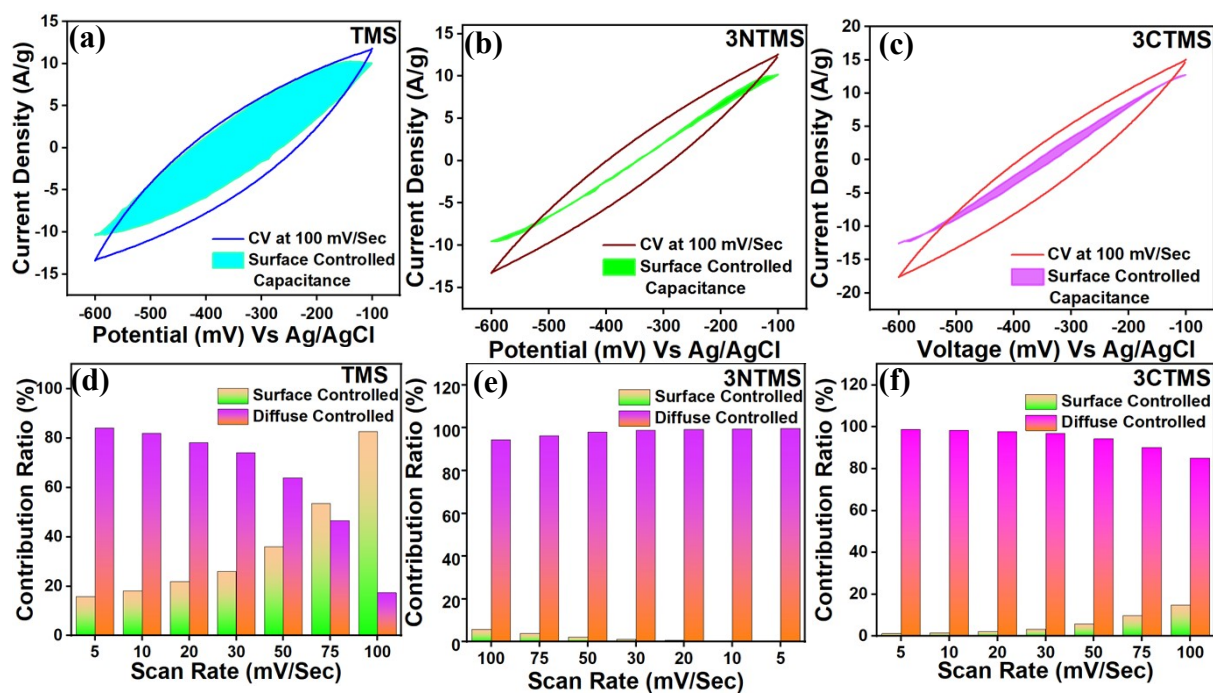

**Fig. S9** Surface controlled capacitance in the total electrochemical response of (a) bare sulphonated  $\text{Ti}_3\text{C}_2\text{T}_x$ , (b) 3 wt%  $\text{NiFe}_2\text{O}_4$  intercalated sulphonated  $\text{Ti}_3\text{C}_2\text{T}_x$ , and (c) 3 wt%  $\text{CoFe}_2\text{O}_4$  intercalated sulphonated  $\text{Ti}_3\text{C}_2\text{T}_x$ . Surface and diffusion-controlled behaviour at different scan rates for (d) bare sulphonated  $\text{Ti}_3\text{C}_2\text{T}_x$ , (e) 3 wt%  $\text{NiFe}_2\text{O}_4$  intercalated sulphonated  $\text{Ti}_3\text{C}_2\text{T}_x$ , and (f) 3 wt%  $\text{CoFe}_2\text{O}_4$  intercalated sulphonated  $\text{Ti}_3\text{C}_2\text{T}_x$ .

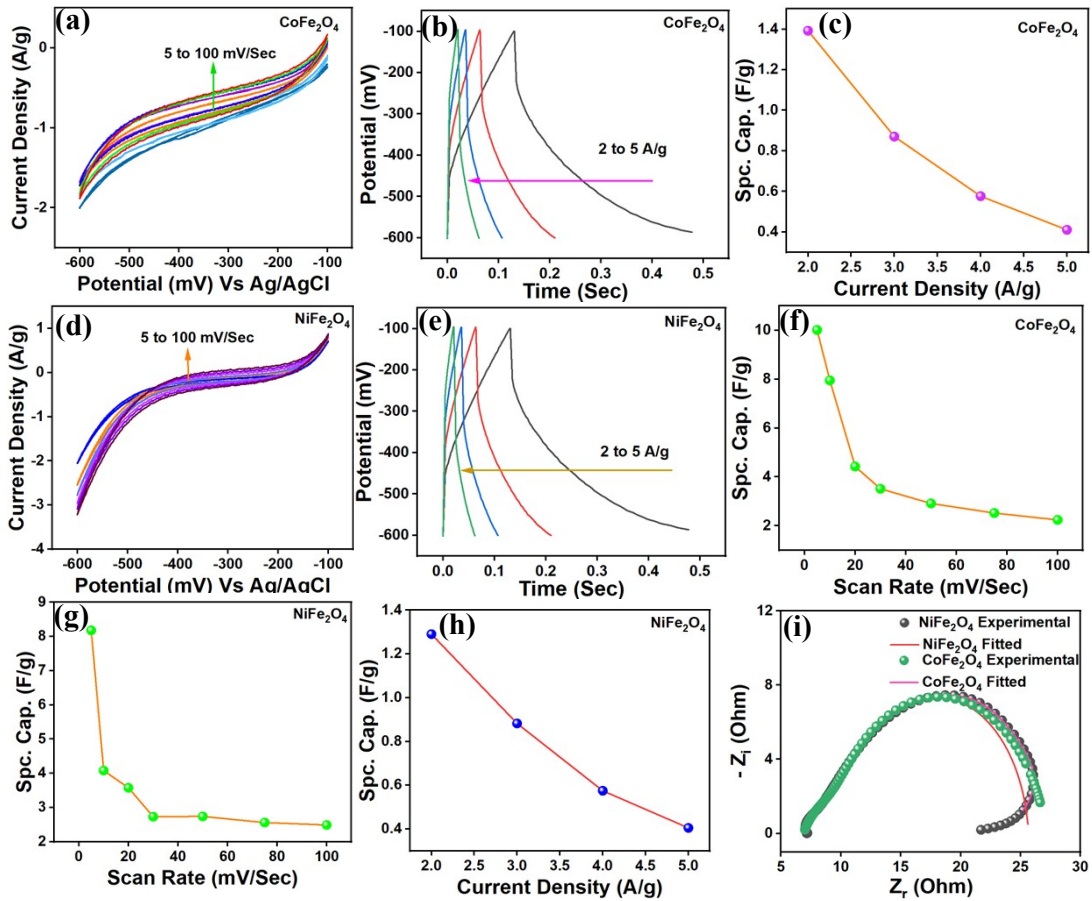

**Fig. S10** Electrochemical response of  $\text{CoFe}_2\text{O}_4$ : (a) CV curves, (b) GCD curves, (c) current density retention, (f) scan rate retention curves., Electrochemical response of  $\text{NiFe}_2\text{O}_4$ : (d) CV curves, (e) GCD curves, (g) scan rate retention and (h) current density retention curves. (i) EIS spectra and fitted curves for both  $\text{CoFe}_2\text{O}_4$  and  $\text{NiFe}_2\text{O}_4$ .

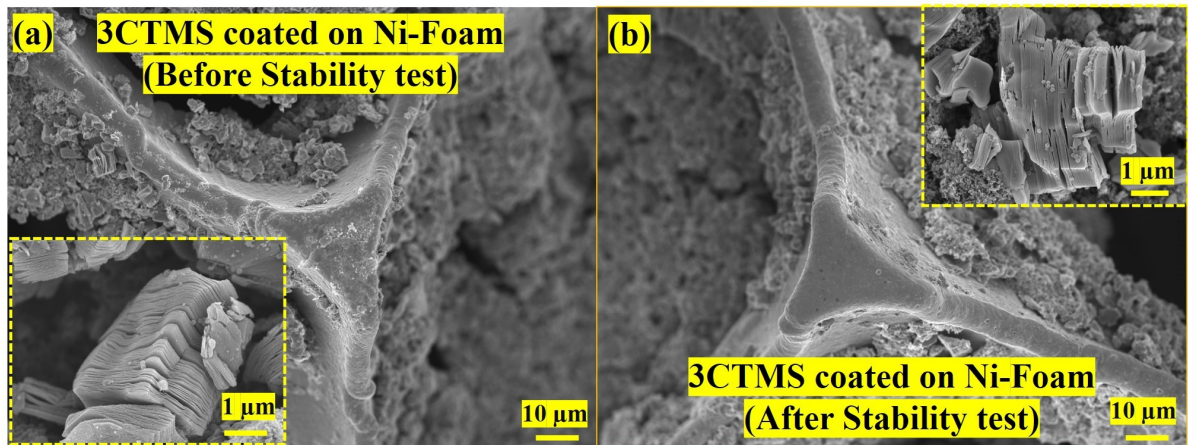

**Fig. S11** FESEM images of 3 wt%  $\text{CoFe}_2\text{O}_4$  intercalated in multilayered sulphonated  $\text{Ti}_3\text{C}_2\text{T}_x$  MXene coated on Ni foam (a) before and (b) after the CV stability test after 10,000 cycles.

**Fig. S11a** shows the active sample 3CTMS coated onto the surface of Ni-foam before starting the CV cycling stability test. The FESEM image shows the uniform coating of 3CTMS across the Ni foam surface at  $10\ \mu\text{m}$  magnification. The inset image in **Fig. S11a** shows the 3CTMS layered sulphonated layered surface. The decline in specific capacitance obtained in cyclic stability study can be attributed to the fact of electrolyte ion saturation at the interface of electrode and electrolyte.<sup>11</sup> The integrity and stable layers of the sulphonated MXene sheets can be observed in **Fig. S11b** (inset). This demonstrates the effectiveness in addressing the mitigation of restacking issue in  $\text{Ti}_3\text{C}_2\text{T}_x$  layered MXene.



**Table S2. Specific capacitance of CFO, NFO, TMS, (3,5,7 wt%) CTMS and (3,5,7 wt%) NTMS at various scan rates and current densities**

| Materials         |              | Scan rate (mV/sec) |      |     |      |      |     | Current Density (A/g) |      |      |      |      |
|-------------------|--------------|--------------------|------|-----|------|------|-----|-----------------------|------|------|------|------|
|                   |              | 5                  | 10   | 20  | 30   | 50   | 75  | 100                   | 2    | 3    | 4    | 5    |
| TMS               |              | 303                | 265  | 219 | 185  | 133  | 89  | 63                    | 338  | 116  | 76   | 55   |
| CFO               |              | 10                 | 7    | 4   | 3.5  | 2.9  | 2.5 | 2.2                   | 1.39 | 0.87 | 0.57 | 0.41 |
| NFO               |              | 8.17               | 4.08 | 3.5 | 2.74 | 2.73 | 2.5 | 2.4                   | 1.29 | 0.88 | 0.56 | 0.40 |
| CTMS<br>(TMS+CFO) | <u>3 wt%</u> | 593                | 490  | 338 | 237  | 131  | 76  | 50                    | 620  | 450  | 390  | 267  |
|                   | <u>5 wt%</u> | 377                | 322  | 244 | 200  | 131  | 83  | 57                    | 585  | 442  | 190  | 151  |
|                   | <u>7 wt%</u> | 223                | 201  | 170 | 146  | 110  | 79  | 58                    | 219  | 128  | 88   | 72   |
| NTMS<br>(TMS+NFO) | <u>3 wt%</u> | 567                | 423  | 277 | 186  | 100  | 56  | 37                    | 591  | 527  | 356  | 244  |
|                   | <u>5 wt%</u> | 412                | 341  | 239 | 180  | 107  | 63  | 43                    | 648  | 534  | 294  | 38   |
|                   | <u>7 wt%</u> | 278                | 246  | 204 | 173  | 124  | 84  | 59                    | 362  | 290  | 135  | 22   |

**Table S3. Fitted Equivalent Circuit Parameters of TMS and different percent CFO and NFO based electrode**

| Parameters  | TMS     | 3CTMS | 3NTMS | 5CTMS  | 5NTMS | 7CTMS | 7NTMS  |
|-------------|---------|-------|-------|--------|-------|-------|--------|
| $R_s$       | 4.06    | 4.35  | 4.59  | 4.87   | 5.08  | 4.91  | 5.23   |
| $R_{ct1}$   | 3.76E10 | 1.36  | 5.58  | 14.29  | 0.61  | 13.25 | 2.06   |
| $Q_{1-Y_0}$ | 0.326   | 0.613 | 0.409 | 0.8382 | 0.301 | 0.48  | 0.313  |
| $Q_{1-n}$   | 1.021   | 0.38  | 0.76  | 0.359  | 1.54  | 15.16 | 2.56   |
| $R_{ct2}$   | 10.13   | 10.76 | 12.12 | 17.41  | 11.01 | 27.91 | 25.9   |
| $Q_{2-Y_0}$ | 13.5    | 34.62 | 260.5 | 5.886  | 80.2  | 410.9 | 154.36 |
| $Q_{2-n}$   | 0.366   | 0.836 | 0.605 | 0.343  | 0.662 | 0.999 | 0.879  |

**Table S4. Surface and diffusion-controlled behaviour of TMS, 3CTMS and 3NTMS at various scan rates**

| Scan Rate<br>(mV/sec) | TMS                            |                                  | 3NTMS                          |                                  | 3CTMS                          |                                  |
|-----------------------|--------------------------------|----------------------------------|--------------------------------|----------------------------------|--------------------------------|----------------------------------|
|                       | Surface Controlled capacitance | Diffusion Controlled capacitance | Surface Controlled capacitance | Diffusion Controlled capacitance | Surface Controlled capacitance | Diffusion Controlled capacitance |
| 100                   | 82.67                          | 17.32                            | 5.72                           | 94.28                            | 14.84                          | 85.15                            |
| 75                    | 53.47                          | 46.52                            | 3.77                           | 96.23                            | 9.87                           | 90.15                            |
| 50                    | 36.03                          | 63.96                            | 2.11                           | 97.89                            | 5.72                           | 94.27                            |
| 30                    | 25.91                          | 74.08                            | 1.13                           | 98.87                            | 3.15                           | 96.84                            |
| 20                    | 21.83                          | 78.16                            | 0.76                           | 99.24                            | 2.21                           | 97.78                            |
| 10                    | 18.03                          | 81.96                            | 0.49                           | 99.51                            | 1.52                           | 98.47                            |
| 5                     | 15.77                          | 84.22                            | 0.37                           | 99.63                            | 1.26                           | 98.73                            |

**Table S5. Electrochemical performance comparison table of 3CTMS and 3NTMS electrode**

| Sl. No. | Material                                      | Method for making composite                                                                                          | Sulphonation | Electrolyte                          | Specific Capacitance | Stability                 | References |
|---------|-----------------------------------------------|----------------------------------------------------------------------------------------------------------------------|--------------|--------------------------------------|----------------------|---------------------------|------------|
| 1       | NiCo <sub>2</sub> _LDH@MXene/ rGO             | Hydrothermal                                                                                                         | No           | 2 M KOH                              | 332.2 mAh/g at 1 A/g | 87.5% after 5,000 cycles  | 12         |
| 2       | MnFeO <sub>3</sub> _MXene                     | Hydrothermal                                                                                                         | No           | 1 M KOH                              | 1077 F/g             | 96 % after 3,000 cycles   | 13         |
| 3       | LaMnO <sub>3-<math>\delta</math></sub> _MXene | Stirring                                                                                                             | No           | 3 M KOH                              | 442.8 F/g at 3 A/g   | 93.5% after 5,000 cycles  | 14         |
| 4       | CoFe <sub>2</sub> O <sub>4</sub> _MXene       | Sonication Mixing (CoFe <sub>2</sub> O <sub>4</sub> (90) : Ti <sub>3</sub> C <sub>2</sub> T <sub>x</sub> MXene (10)) | No           | 0.1 M KOH                            | 1268.75 F/g at 1 A/g | 97 % after 5,000 cycles   | 15         |
| 5       | Boron Nitride_MXene_WS <sub>2</sub>           | Hydrothermal                                                                                                         | No           | 1 M KOH                              | 1318 F/g at 1 A/g    | 84% after 10,000 cycles.  | 16         |
| 6       | Ag <sub>2</sub> CrO <sub>4</sub> _MXene       | Sonication                                                                                                           | No           | 0.1 M H <sub>2</sub> SO <sub>4</sub> | 525 F/g at 10 mV/sec | -                         | 17         |
| 7       | rGO_MXene                                     | Sonication                                                                                                           | No           | PVA- H <sub>2</sub> SO <sub>4</sub>  | 140 F/g at 1 A/g     | 85 % after 10,000 cycles. | 18         |
| 8       | MnO <sub>2</sub> _MXene_C                     | Hydrothermal                                                                                                         | No           | 3 M KOH                              | 511 F/g at 1 A/g     | 83% after 10,000 cycles   | 19         |
|         | MnO <sub>2</sub> _MXene                       | Hydrothermal                                                                                                         | No           | 0.5 M K <sub>2</sub> SO <sub>4</sub> | 242 F/g at 1 A/g     | 97% after 5000 cycles     | 20         |
| 9       | 1T_MoS <sub>2</sub> _MXene                    | Hydrothermal                                                                                                         | No           | PVA-H <sub>2</sub> SO <sub>4</sub>   | 386.7 F/g at 1 A/g   | 91 % after 20,000 cycles  | 21         |
| 10      | MXene_rGO                                     | Sonication Mixing                                                                                                    | No           | 3 M H <sub>2</sub> SO <sub>4</sub>   | 329.9 F/g at 5 mV    | 90% after 40,000 cycles   | 22         |

|    |                                                                                                    |                      |     |                                      |                        |                                                                      |              |
|----|----------------------------------------------------------------------------------------------------|----------------------|-----|--------------------------------------|------------------------|----------------------------------------------------------------------|--------------|
| 11 | MXene_BaTiO <sub>3</sub>                                                                           | Sonication<br>Mixing | No  | 0.1 M H <sub>2</sub> SO <sub>4</sub> | 254.28F/g at 1<br>A/g  | 74% after<br>10,000<br>cycles.                                       | 23           |
| 12 | 3NTMS<br>(3% NiFe <sub>2</sub> O <sub>4</sub> -<br>Ti <sub>3</sub> C <sub>2</sub> T <sub>x</sub> ) | Sonication<br>Mixing | Yes | 0.1 M H <sub>2</sub> SO <sub>4</sub> | 567.422 F/g at 5<br>mV | 93.29 %<br>5,000<br>cycles.<br>80.65 %<br>after<br>10,000<br>cycles. | Present Work |
| 13 | 3CTMS<br>(3% CoFe <sub>2</sub> O <sub>4</sub> -<br>Ti <sub>3</sub> C <sub>2</sub> T <sub>x</sub> ) | Sonication<br>Mixing | Yes | 0.1 M H <sub>2</sub> SO <sub>4</sub> | 593.81 F/g at 5<br>mV  | 95.9 %<br>5,000<br>cycles.<br>81.75 %<br>after<br>10,000<br>cycles.  | Present Work |

### Theoretical Procedure and Findings-

The Quantum ESPRESSO electronic package was utilized to perform geometry optimization on Ti<sub>3</sub>C<sub>2</sub> MXene and sulphonated composite systems using density functional theory (DFT).<sup>24</sup> Exchange-correlation effects were accounted for using the generalized gradient approximation (GGA) with Perdew–Burke–Ernzerhof (PBE) and ultrasoft pseudopotentials from the PSLibrary.<sup>25</sup> A kinetic energy cutoff of 25 Ry and a charge density cutoff of 225 Ry were applied for the plane-wave expansion. The Brillouin zone was sampled using a 9 × 9 × 1 uniform Monkhorst–Pack k-point mesh, and the Broyden–Fletcher–Goldfarb–Shanno (BFGS) algorithm was employed for atomic structure relaxation with a convergence threshold set at a residual force of 10<sup>-4</sup> Ry/Å.<sup>26,27</sup> After structure relaxation, the generalized gradient approximation of Perdew–Burke Ernzerhof (GGA-PBE96) was adopted in NanoDecal to extract the bandgap and density of states (DOS). Double zeta with polarisation (DZP) basic sets and non-conserving pseudopotentials were employed with a 225 Ry cutoff for the real-space grid. In the Non-Equilibrium Green's Function (NEGF)-DFT analysis, physical quantities and the NEGF were expanded using a double-ζ polarized atomic orbital basis and a Monkhorst–Pack mesh of 9 x 9 x 1 for k-points sampling. **Fig S12a** shows the super cell used for Ti<sub>3</sub>C<sub>2</sub> MXene. The electronic band structures and DOS for

pristine  $\text{Ti}_3\text{C}_2$  MXene are presented in **Fig. S12b** and **c**, respectively.<sup>28</sup> To study the band structural modification after sulphonation,  $-\text{SO}_3^{2-}$  group was added and tested as indicated in **Fig S12d**. **Fig S12e** shows the generation of new electronics bands in sulphonated MXene, accompanied by an increase in states at energy levels near -10, -3 and 2.3 eV (**Fig. S12f**), attributed to the enhanced conductive sites compared to pristine MXene. The incorporation of a  $\text{CoFe}_2\text{O}_4$  lattice into sulphonated MXene was modelled by constructing the supercell depicted in **Fig. S12g**. Further increase in number of bands in the conduction band region can be observed in **Fig. S12h** and **i**. The calculated band gaps for pristine  $\text{Ti}_3\text{C}_2$  MXene, sulphonated MXene (TMS) and  $\text{CoFe}_2\text{O}_4$  incorporated TMS were 3.404 eV, 3.196 eV and 3.667 eV, respectively. In the present work, TMS and various (3, 5, 7) wt %  $\text{CoFe}_2\text{O}_4$  incorporated in TMS are studied for the electrochemical energy storage. Higher band gap materials demonstrate superior electrochemical and thermal stability, which supports reversible redox reactions over extended cycles and improves overall charge storage capability.<sup>29</sup> The observed increase in band gap for  $\text{CoFe}_2\text{O}_4$  incorporated TMS can be attributed due to the addition of the  $-\text{SO}_3^{2-}$  functional group, which increases the active sites for electrolyte ion interactions.<sup>30</sup> The theoretical analysis demonstrates that the synergetic effect of  $\text{CoFe}_2\text{O}_4$  incorporation in TMS contributes to improved charge storage performance.



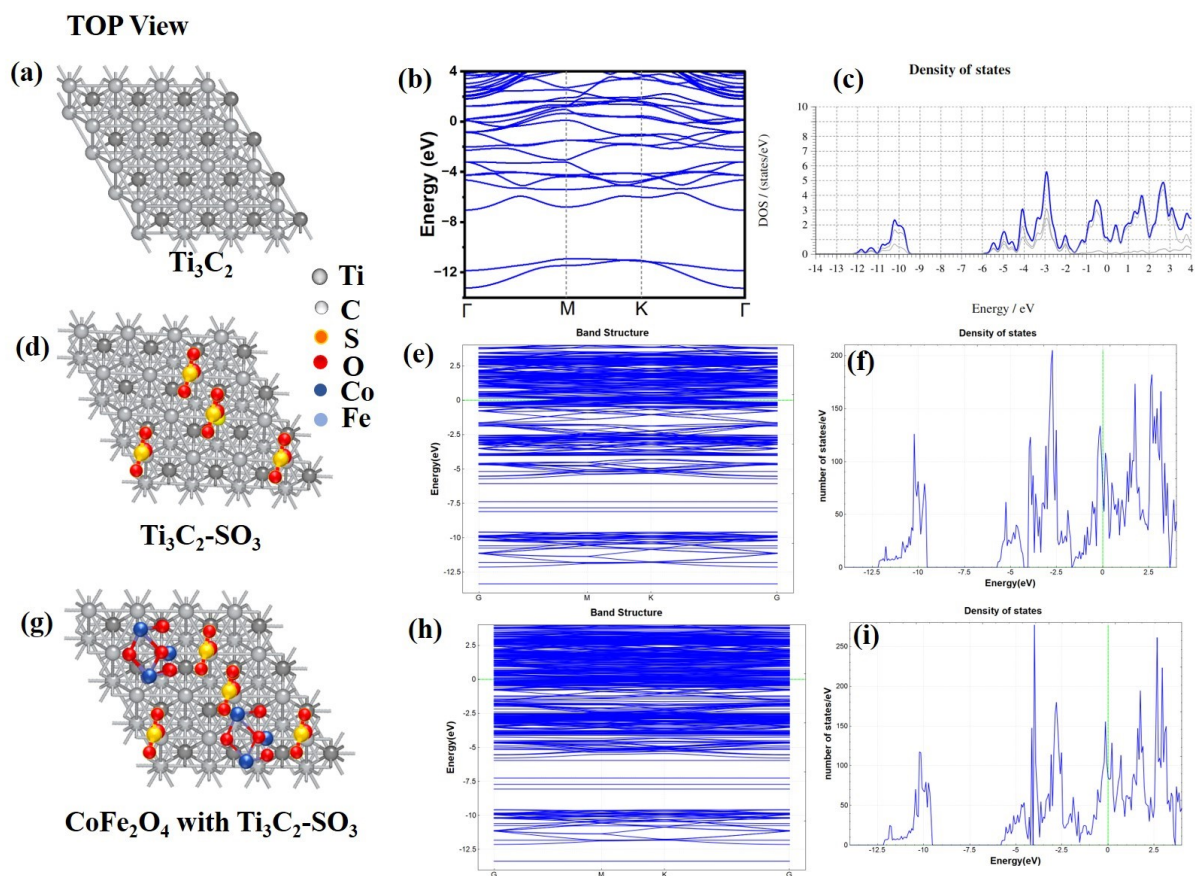

**Fig. S12** (a) Top view image, (b) Electronic band structure and (c) DOS of  $\text{Ti}_3\text{C}_2$  MXene super cell used for calculation, (d) Top view image, (e) Electronic band structure and (f) DOS of  $\text{Ti}_3\text{C}_2$  sulphonated MXene super cell used for calculation, (g) Top view image, (h) Electronic band structure and (i) DOS of single  $\text{CoFe}_2\text{O}_4$  attached to  $\text{Ti}_3\text{C}_2$  sulphonated MXene super cell used for calculation.

**Video :-**

[https://drive.google.com/drive/folders/1WyLhB8N33qkHZNpri\\_3wgEb8cbu-sYmf?usp=sharing](https://drive.google.com/drive/folders/1WyLhB8N33qkHZNpri_3wgEb8cbu-sYmf?usp=sharing)

## References

- 1 H. Ahmad, A. A. Kamely, N. Yusoff, L. Bayang and M. Z. Samion, *Sci. Rep.*, 2020, **10**, 1–11.
- 2 A. M. Jastrzębska, A. Szuplewska, A. Rozmysłowska-Wojciechowska, M. Chudy, A. Olszyna, M. Birowska, M. Popielski, J. A. Majewski, B. Scheibe, V. Natu and M. W. Barsoum, *2D Mater.*, , DOI:10.1088/2053-1583/ab6a60.
- 3 W. Y. Chen, X. Jiang, S. N. Lai, D. Peroulis and L. Stanciu, *Nat. Commun.*, 2020, **11**, 1–10.
- 4 M. Yu, Z. Feng, Y. Huang, K. Wang and L. Liu, *J. Mater. Sci. Mater. Electron.*, 2019, **30**, 4174–4183.
- 5 Z. Hou, C. Liu, J. Gong, J. Wu, S. Sun, M. Zhang and X. Sun, *Coatings*, , DOI:10.3390/coatings12101532.
- 6 N. Dalai, B. Mohanty, A. Mitra and B. Jena, *ChemistrySelect*, 2019, **4**, 7791–7796.
- 7 R. S. Yadav, I. Kuritka, J. Vilčáková, M. Machovský, D. Škoda, P. Urbánek, M. Masar, M. Goralik, M. Urbánek, L. Kalina and J. Havlica, *Nanomaterials*, , DOI:10.3390/nano9040621.
- 8 M. Hua, L. Xu, F. Cui, J. Lian, Y. Huang, J. Bao, J. Qiu, Y. Xu, H. Xu, Y. Zhao and H. Li, *J. Mater. Sci.*, 2018, **53**, 7621–7636.
- 9 R. Wang, Y. Wang, C. Wu, T. Zhai, J. Yang, B. Sun, S. Duhm and N. Koch, *Adv. Funct. Mater.*, , DOI:10.1002/adfm.201903440.
- 10 X. Niu, Y. Chen and H. Hu, *Membranes (Basel)*, 2022, **12**, 4–13.
- 11 N. Kumar, S. Bin Kim, S. Y. Lee and S. J. Park, *Nanomaterials*, , DOI:10.3390/nano12203708.
- 12 J. Zheng, X. Pan, X. Huang, D. Xiong, Y. Shang, X. Li, N. Wang, W. M. Lau and H. Y. Yang, *Chem. Eng. J.*, 2020, **396**, 125197.
- 13 Z. A. Sheikh, D. Vikraman, H. Kim, S. Aftab, S. F. Shaikh, F. Shahzad, J. Jung, H. S. Kim, S. Hussain and D. K. Kim, *J. Energy Storage*, 2024, **81**, 110342.
- 14 A. K. Tomar, T. Kshetri, N. H. Kim and J. H. Lee, *Energy Storage Mater.*, 2022, **50**, 86–95.
- 15 I. Ayman, A. Rasheed, S. Ajmal, A. Rehman, A. Ali, I. Shakir and M. F. Warsi, *Energy and Fuels*, 2020, **34**, 7622–7630.
- 16 S. De, S. Acharya, C. K. Maity and G. C. Nayak, *ACS Appl. Nano Mater.*, 2023, **6**, 11175–11186.
- 17 T. Yaqoob, M. Rani, A. Mahmood, R. Shafique, S. Khan, N. K. Janjua, A. A. Shah, A. Ahmad and A. A. Al-Kahtani, *Materials (Basel)*, , DOI:10.3390/ma14206008.
- 18 Y. Zhou, K. Maleski, B. Anasori, J. O. Thostenson, Y. Pang, Y. Feng, K. Zeng, C. B. Parker, S. Zauscher, Y. Gogotsi, J. T. Glass and C. Cao, *ACS Nano*, 2020, **14**, 3576–3586.
- 19 H. Zhou, Y. Lu, F. Wu, L. Fang, H. J. Luo, Y. X. Zhang and M. Zhou, *J. Alloys Compd.*, 2019, **802**, 259–268.
- 20 Q. Wang, Z. Zhang, Z. Zhang, X. Zhou and G. Ma, *J. Solid State Electrochem.*, 2019, **23**, 361–365.
- 21 X. Wang, H. Li, H. Li, S. Lin, W. Ding, X. Zhu, Z. Sheng, H. Wang, X. Zhu and Y. Sun, *Adv. Funct. Mater.*, 2020, **30**, 1–11.
- 22 J. Miao, Q. Zhu, K. Li, P. Zhang, Q. Zhao and B. Xu, *J. Energy Chem.*, 2021, **52**, 243–250.
- 23 J. Pani and H. Borkar, *J. Electroanal. Chem.*, 2024, **956**, 118092.
- 24 P. Giannozzi, S. Baroni, N. Bonini, M. Calandra, R. Car, C. Cavazzoni, D. Ceresoli, G. L. Chiarotti, M. Cococcioni, I. Dabo, A. Dal Corso, S. De Gironcoli, S. Fabris, G. Fratesi, R. Gebauer, U. Gerstmann, C. Gougoussis, A. Kokalj, M. Lazzeri, L. Martin-

- Samos, N. Marzari, F. Mauri, R. Mazzarello, S. Paolini, A. Pasquarello, L. Paulatto, C. Sbraccia, S. Scandolo, G. Scлаuzero, A. P. Seitsonen, A. Smogunov, P. Umari and R. M. Wentzcovitch, *J. Phys. Condens. Matter*, 2009, **21**, 395502.
- 25 J. P. Perdew, K. Burke and M. Ernzerhof, *Phys. Rev. Lett.*, 1996, **77**, 3865–3868.
- 26 H. J. Monkhorst and J. D. Pack, *Phys. Rev. B*, 1976, **13**, 5188.
- 27 S. R. Billeter, A. J. Turner and W. Thiel, *Phys. Chem. Chem. Phys.*, 2000, **2**, 2177–2186.
- 28 Y. Peng, P. Cai, L. Yang, Y. Liu, L. Zhu, Q. Zhang, J. Liu, Z. Huang and Y. Yang, *ACS Omega*, 2020, **5**, 26486–26496.
- 29 M. R. Islam, N. Farzana, M. R. Akhond, M. Rahaman, M. J. Islam and I. M. Syed, *Mater. Adv.*, 2024, **5**, 2491–2509.
- 30 S. Saha, M. Jana, P. Khanra, P. Samanta, H. Koo, N. Chandra Murmu and T. Kuila, *RSC Adv.*, 2016, **6**, 1380–1387.
